# Supplementary material for: Collateral deletion of the mitochondrial AAA+ ATPase ATAD1 sensitizes cancer cells to proteasome dysfunction
Source: eLife journal article supplement (doi:10.7554/elife.82860), 2022-11-21
Supplement: fig2-data1 [file Fig_2A_BIM EL quantification source data.xlsx]

## Sheet: Sheet1
date		wt	ko	fc
2020-12-10	bimel	4010	4330
	tub	277000	225000
	ratio	0.0144765	0.0192444	1.32935
2019-10-24	bimel	2000	3000
	tub	49500	55800
	ratio	0.040404	0.0537634	1.33065
2019-10-29	bimel	786	1290
	tub	49100	49400
	ratio	0.0160081	0.0261134	1.63125
2019-10-23	bimel	2130	4480
	tub	36700	38200
	ratio	0.0580381	0.117277	2.0207
2019-10-23	bimel	5730	9400
	tub	54700	69900
	ratio	0.104753	0.134478	1.28376
2019-10-14	bimel	2140	2650
	tub	33500	24300
	ratio	0.0638806	0.109053	1.70715

## Sheet: Sheet2
			a2 (BAK1∆)		a7a3 (BAK1∆ ATAD1∆)
	n	protein	-	+	-	+	<-DOX
12.17.20	2	GFP-BIM	3420	10500	5680	15000	0.0139024	0.0446809	0.0251327	0.0643777
		BIM_EL	13200	10100	23500	18600	0.0536585	0.0429787	0.103982	0.0798283
		BIM_L	2120	2460	3570	2960	0.00861789	0.0104681	0.0157965	0.0127039
		Tubulin	246000	235000	226000	233000
	3	GFP-BIM	2130	10400	5450	15500	0.0111518	0.0436975	0.020412	0.0635246
		BIM_EL	11200	12500	20600	16400	0.0586387	0.052521	0.0771536	0.0672131
		BIM_L	1940	1890	3080	2340	0.0101571	0.00794118	0.0115356	0.00959016
		Tubulin	191000	238000	267000	244000
12.5.20	1	GFP-BIM	819	2630	1880	7290	0.00828109	0.0308685	0.0174074	0.0756224
		BIM_EL	4330	3750	8750	4810	0.0437816	0.0440141	0.0810185	0.0498963
		BIM_L	1060	1260	2490	1880	0.0107179	0.0147887	0.0230556	0.0195021
		Tubulin	98900	85200	108000	96400
